# Supplementary material for: Regulation of transmembrane current through modulation of biomimetic lipid membrane composition
Source: Royal Society of Chemistry journal article supplement (doi:10.1039/d4fd00149d), 2024-08-23
Supplement: d4fd00149d1.xlsx [file d4fd00149d1.xlsx]

## Sheet: figure 2c
													position (nm)	height (pm)
													0	209.77
													5.75531	311.662
													11.5106	427.067
													17.2659	481.433
													23.0212	606.041
													28.7766	613.073
													34.5319	419.772
													40.2872	204.79
													46.0425	140.402
													51.7978	162.938
													57.5531	97.421
													63.3084	232.446
													69.0637	335.913
													74.819	424.576
													80.5743	312.438
													86.3297	166.041
													92.085	47.5508
													97.8403	-49.9102
													103.596	-48.6409
													109.351	-44.6433
													115.106	17.3211
													120.862	10.3893
													126.617	-24.0485
													132.372	-15.0997
													138.127	18.8978
													143.883	-43.5729
													149.638	-17.9976
													155.393	19.9123
													161.149	10.8166
													166.904	50.0498
													172.659	62.5189
													178.415	51.2309
													184.17	100.012
													189.925	120.223
													195.681	188.556
													201.436	375.248
													207.191	245.338
													212.946	281.891
													218.702	181.523
													224.457	151.91
													230.212	171.507
													235.968	108.694
													241.723	51.8877
													247.478	18.1848
													253.234	-34.2612
													258.989	26.032
													264.744	46.678
													270.5	16.0261
													276.255	43.8626
													282.01	-0.57479
													287.765	1.37657
													293.521	15.8192
													299.276	-12.8629
													305.031	-38.2477
													310.787	57.4459
													316.542	94.7535
													322.297	28.7517
													328.053	23.1145
													333.808	32.4456
													339.563	82.135
													345.319	-26.4657
													351.074	-5.99793
													356.829	72.145
													362.585	169.514
													368.34	188.893
													374.095	87.1892
													379.851	122.886
													385.606	121.337
													391.361	147.582
													397.116	69.1905
													402.872	-31.7385
													408.627	0.07887
													414.382	-13.0502
													420.138	11.599
													425.893	25.0253
													431.648	88.1124
													437.404	17.651
													443.159	-43.2226
													448.914	-37.7858
													454.67	-24.7022
													460.425	-10.173
													466.18	-1.38627
													471.935	-13.0956
													477.691	77.9066
													483.446	304.164
													489.201	171.861
													494.957	39.1087
													500.712	-14.9876
													506.467	-55.0037
													512.223	163.482
													517.978	34.5024
													523.733	-47.2221
													529.489	-78.2122
													535.244	-31.6643
													540.999	-50.851
													546.755	-29.806
													552.51	-85.8561
													558.265	-53.6824
													564.02	-13.1605
													569.776	-35.8835
													575.531	-65.3722
													581.286	27.6358

## Sheet: figure 3d
2θ (degree)	intensity (a.u.)
5.00657	2312.62
5.0197	2306.09
5.03283	2301.56
5.04596	2299.06
5.05909	2298.57
5.07222	2300.1
5.08535	2302.85
5.09848	2311.08
5.11161	2338.43
5.12474	2338.44
5.13787	2341.93
5.151	2328.76
5.16413	2325.65
5.17726	2314.94
5.19039	2279.71
5.20352	2256.34
5.21665	2245.17
5.22978	2253.89
5.24291	2268.13
5.25604	2258.84
5.26917	2289.19
5.2823	2312.94
5.29543	2342.83
5.30856	2349.44
5.32169	2351.05
5.33482	2361.07
5.34795	2369.37
5.36108	2365.62
5.37421	2354.66
5.38734	2334.98
5.40047	2344.83
5.4136	2343.08
5.42673	2355.38
5.43986	2357.79
5.45299	2356.9
5.46613	2354.98
5.47926	2352.55
5.49239	2359.37
5.50552	2363.94
5.51865	2376.69
5.53178	2382.8
5.54491	2370.91
5.55804	2379.38
5.57117	2370.21
5.5843	2367.96
5.59743	2379.04
5.61056	2367.91
5.62369	2381.65
5.63682	2384.46
5.64995	2400.57
5.66308	2385.42
5.67621	2366.52
5.68934	2368.4
5.70247	2365.85
5.7156	2373.69
5.72873	2387.21
5.74186	2364.45
5.75499	2370
5.76812	2381.75
5.78125	2401.14
5.79438	2387.85
5.80751	2399.26
5.82064	2404.53
5.83377	2418.89
5.8469	2436.22
5.86003	2447.06
5.87316	2443.74
5.88629	2448.82
5.89942	2458.94
5.91255	2471.24
5.92568	2440.42
5.93882	2438.83
5.95195	2425.17
5.96508	2420.56
5.97821	2416.36
5.99134	2414.83
6.00447	2419.54
6.0176	2415.15
6.03073	2433.04
6.04386	2446
6.05699	2435.06
6.07012	2455.23
6.08325	2452.74
6.09638	2456.27
6.10951	2453.93
6.12264	2447.57
6.13577	2429.5
6.1489	2412.49
6.16203	2410.97
6.17516	2411.71
6.18829	2419.06
6.20142	2425.79
6.21455	2434.25
6.22768	2464.92
6.24081	2490.66
6.25394	2489.37
6.26707	2496.34
6.2802	2505.17
6.29333	2505.55
6.30646	2506.71
6.31959	2489.51
6.33272	2475.18
6.34585	2462.52
6.35898	2467.42
6.37211	2465.74
6.38524	2454.85
6.39838	2464.03
6.41151	2483.04
6.42464	2499.67
6.43777	2498.59
6.4509	2490.77
6.46403	2492.28
6.47716	2486.85
6.49029	2502.48
6.50342	2496.45
6.51655	2493.62
6.52968	2489.95
6.54281	2492.03
6.55594	2492.99
6.56907	2474.35
6.5822	2474.1
6.59533	2455.32
6.60846	2453.01
6.62159	2463.27
6.63472	2455.06
6.64785	2461.07
6.66098	2466.5
6.67411	2476
6.68724	2484.21
6.70037	2489.82
6.7135	2514.14
6.72663	2508.96
6.73976	2523.1
6.75289	2523.74
6.76602	2519.33
6.77915	2521.36
6.79228	2518.61
6.80541	2527.51
6.81854	2536.67
6.83167	2551.78
6.8448	2559.31
6.85793	2566.31
6.87107	2581.31
6.8842	2578.08
6.89733	2567.72
6.91046	2559.85
6.92359	2556.3
6.93672	2541.44
6.94985	2549.16
6.96298	2538.73
6.97611	2537.91
6.98924	2548.64
7.00237	2555.79
7.0155	2574.45
7.02863	2575.5
7.04176	2584.11
7.05489	2576.22
7.06802	2565.62
7.08115	2565.54
7.09428	2573.03
7.10741	2612.46
7.12054	2618.26
7.13367	2616.17
7.1468	2619.11
7.15993	2613.79
7.17306	2626.51
7.18619	2613.93
7.19932	2611.97
7.21245	2613.32
7.22558	2632.12
7.23871	2658.52
7.25184	2650.65
7.26497	2642.79
7.2781	2645.28
7.29123	2667.86
7.30436	2678.59
7.31749	2667.07
7.33063	2663.51
7.34376	2665.68
7.35689	2643.79
7.37002	2657.84
7.38315	2646.69
7.39628	2673.55
7.40941	2708.06
7.42254	2729.62
7.43567	2735.1
7.4488	2733.1
7.46193	2724.9
7.47506	2722.32
7.48819	2714.85
7.50132	2721.18
7.51445	2721.08
7.52758	2758.47
7.54071	2772.81
7.55384	2766.05
7.56697	2772.73
7.5801	2773.4
7.59323	2771.96
7.60636	2792.42
7.61949	2793.91
7.63262	2801.33
7.64575	2814.34
7.65888	2808.52
7.67201	2808.52
7.68514	2799.03
7.69827	2793.72
7.7114	2796.16
7.72453	2796.09
7.73766	2803.45
7.75079	2796.46
7.76392	2814.29
7.77705	2812.37
7.79019	2811.98
7.80332	2833.46
7.81645	2829.17
7.82958	2832.76
7.84271	2846.17
7.85584	2841.06
7.86897	2849.21
7.8821	2864.17
7.89523	2876.08
7.90836	2873.54
7.92149	2877.51
7.93462	2891.33
7.94775	2888.11
7.96088	2895.01
7.97401	2907.29
7.98714	2903.23
8.00027	2936.42
8.0134	2960.4
8.02653	2980.47
8.03966	2995.14
8.05279	2989.15
8.06592	2986.72
8.07905	2973.57
8.09218	2959.21
8.10531	2952.18
8.11844	2969.24
8.13157	2966.74
8.1447	2978.99
8.15783	2998.86
8.17096	3017.09
8.18409	3028.94
8.19722	3030
8.21035	3055.09
8.22348	3078.64
8.23661	3107.16
8.24974	3140.16
8.26288	3130.67
8.27601	3151.22
8.28914	3146.19
8.30227	3154.55
8.3154	3156.37
8.32853	3144.32
8.34166	3142.76
8.35479	3141.49
8.36792	3149.6
8.38105	3158.03
8.39418	3183.56
8.40731	3204.6
8.42044	3224.27
8.43357	3246.98
8.4467	3262.17
8.45983	3256.56
8.47296	3245.57
8.48609	3250.28
8.49922	3271.99
8.51235	3267.39
8.52548	3269.84
8.53861	3281.3
8.55174	3308.29
8.56487	3321.56
8.578	3350.45
8.59113	3335.17
8.60426	3354.23
8.61739	3379.2
8.63052	3396.77
8.64365	3365.69
8.65678	3371.84
8.66991	3397.87
8.68304	3422.5
8.69617	3442.57
8.7093	3465.52
8.72244	3490.98
8.73557	3521.76
8.7487	3540.67
8.76183	3546.09
8.77496	3536.8
8.78809	3554.38
8.80122	3553.21
8.81435	3542.75
8.82748	3540.22
8.84061	3536.81
8.85374	3574.66
8.86687	3586.65
8.88	3599.17
8.89313	3605.28
8.90626	3623.55
8.91939	3655.42
8.93252	3667.72
8.94565	3676.56
8.95878	3699.65
8.97191	3691.07
8.98504	3717.03
8.99817	3738.01
9.0113	3752.08
9.02443	3770.52
9.03756	3809.57
9.05069	3838.83
9.06382	3867.07
9.07695	3905.91
9.09008	3925.7
9.10321	3919.83
9.11634	3938.27
9.12947	3965.93
9.1426	3981.07
9.15573	3994.35
9.16886	4010.36
9.182	4018.47
9.19513	4029.09
9.20826	4056.35
9.22139	4052.87
9.23452	4078.74
9.24765	4097.77
9.26078	4142.62
9.27391	4149.83
9.28704	4151.5
9.30017	4184.4
9.3133	4211.3
9.32643	4215.74
9.33956	4242.29
9.35269	4244.02
9.36582	4292.9
9.37895	4314.02
9.39208	4355.53
9.40521	4368.38
9.41834	4392.33
9.43147	4419.82
9.4446	4436.51
9.45773	4424.4
9.47086	4452.68
9.48399	4464.12
9.49712	4507.11
9.51025	4531.43
9.52338	4564.28
9.53651	4606.31
9.54964	4646.45
9.56277	4672.95
9.5759	4701.01
9.58903	4700.48
9.60216	4762
9.61529	4784.9
9.62842	4827.02
9.64155	4843.86
9.65469	4868.1
9.66782	4910.29
9.68095	4950.42
9.69408	4953.2
9.70721	4960.75
9.72034	4974.61
9.73347	5019.03
9.7466	5055.91
9.75973	5090.63
9.77286	5117.93
9.78599	5178.59
9.79912	5225.49
9.81225	5259.4
9.82538	5280.91
9.83851	5320.87
9.85164	5360.61
9.86477	5377.55
9.8779	5419.7
9.89103	5432.98
9.90416	5481.12
9.91729	5508.88
9.93042	5554.39
9.94355	5584.06
9.95668	5660.37
9.96981	5704.57
9.98294	5771.6
9.99607	5799.2
10.0092	5856.79
10.0223	5911.4
10.0355	5986.6
10.0486	6054.7
10.0617	6139.43
10.0748	6172.75
10.088	6227.07
10.1011	6240.85
10.1143	6266.66
10.1274	6276.62
10.1405	6314.32
10.1536	6384.74
10.1668	6460.78
10.1799	6533.71
10.193	6594.27
10.2062	6641.14
10.2193	6678.25
10.2324	6702.95
10.2455	6766.55
10.2587	6830.56
10.2718	6900.06
10.2849	7004.87
10.2981	7102.25
10.3112	7182.24
10.3243	7275.91
10.3375	7329.22
10.3506	7369.81
10.3637	7433.96
10.3768	7522.36
10.39	7585.48
10.4031	7649.05
10.4162	7748.26
10.4294	7850.03
10.4425	7954.04
10.4556	8088.36
10.4688	8172.96
10.4819	8265.73
10.495	8368.79
10.5082	8473.75
10.5213	8576.16
10.5344	8669.99
10.5475	8784.16
10.5607	8871.19
10.5738	8974.38
10.5869	9074.41
10.6001	9186.23
10.6132	9297.23
10.6263	9424.41
10.6395	9557.18
10.6526	9684.4
10.6657	9849.97
10.6789	9995.68
10.692	10161
10.7051	10342.2
10.7182	10517.9
10.7314	10724.3
10.7445	10907.9
10.7576	11087.2
10.7708	11236.9
10.7839	11401.2
10.797	11557.6
10.8102	11724.6
10.8233	11959.6
10.8364	12188.7
10.8495	12428.4
10.8627	12681.5
10.8758	12959.8
10.8889	13209.6
10.9021	13463.5
10.9152	13724.5
10.9283	13949.8
10.9414	14260
10.9546	14539.9
10.9677	14800.2
10.9808	15079.5
10.994	15375.4
11.0071	15705.3
11.0202	15970
11.0334	16259.2
11.0465	16555.7
11.0596	16852.4
11.0728	17178.2
11.0859	17434.3
11.099	17679.3
11.1121	18002.3
11.1253	18304.8
11.1384	18587.8
11.1515	18855.3
11.1647	19126.8
11.1778	19389.8
11.1909	19576.5
11.2041	19737.6
11.2172	19876.3
11.2303	20010.1
11.2434	20155.2
11.2566	20182.4
11.2697	20188.9
11.2828	20199.7
11.296	20142.8
11.3091	20056.8
11.3222	19905.8
11.3354	19765.8
11.3485	19570.1
11.3616	19401.5
11.3748	19134.7
11.3879	18823.9
11.401	18541
11.4141	18207.9
11.4273	17859
11.4404	17507.9
11.4535	17131.3
11.4667	16801
11.4798	16401.2
11.4929	16049.4
11.5061	15648.7
11.5192	15299
11.5323	14968
11.5455	14582.3
11.5586	14246
11.5717	13918.9
11.5848	13564.6
11.598	13220
11.6111	12851.9
11.6242	12474.7
11.6374	12141.9
11.6505	11821.3
11.6636	11516.9
11.6768	11199.5
11.6899	10946.3
11.703	10686.2
11.7161	10387.8
11.7293	10119.4
11.7424	9872.89
11.7555	9606.82
11.7687	9381.14
11.7818	9158.62
11.7949	8961.73
11.808	8757.38
11.8212	8547.09
11.8343	8330.76
11.8474	8140.38
11.8606	7977.48
11.8737	7804.75
11.8868	7614.48
11.9	7448
11.9131	7296.18
11.9262	7160.34
11.9393	7004.1
11.9525	6861.66
11.9656	6723.82
11.9787	6590.58
11.9919	6461.94
12.005	6337.9

## Sheet: figure 3e
GO		ssDNA@GO
binding energy (eV)	intensity (a.u.)	binding energy (eV)	intensity (a.u.)
144.2	2347.64	144.5	3747.07
144.1	2534.18	144.4	3566.48
144	2414.41	144.3	3630.22
143.9	2458.42	144.2	3448.45
143.8	2578.65	144.1	3473.69
143.7	2496.39	144	3477.08
143.6	2438.34	143.9	3605.27
143.5	2643.47	143.8	3653.09
143.4	2429.26	143.7	3660.11
143.3	2527.02	143.6	3457.4
143.2	2537.8	143.5	3499.98
143.1	2554.26	143.4	3572.16
143	2630.04	143.3	3496.04
142.9	2491.62	143.2	3530.81
142.8	2487.87	143.1	3452.11
142.7	2526.68	143	3454.76
142.6	2454.54	142.9	3429.83
142.5	2479.45	142.8	3471.61
142.4	2444.54	142.7	3550.2
142.3	2454.47	142.6	3536.36
142.2	2372.13	142.5	3385.53
142.1	2471.92	142.4	3449.07
142	2399.81	142.3	3567.1
141.9	2477.31	142.2	3398.1
141.8	2543.71	142.1	3423.44
141.7	2503.93	142	3454.56
141.6	2582	141.9	3545.84
141.5	2551.85	141.8	3563.12
141.4	2539.42	141.7	3530.74
141.3	2418.04	141.6	3441.61
141.2	2454.96	141.5	3541.87
141.1	2535.4	141.4	3595.18
141	2573.89	141.3	3638.89
140.9	2470.37	141.2	3638.62
140.8	2443.86	141.1	3586.16
140.7	2493.49	141	3454.88
140.6	2550.54	140.9	3549.99
140.5	2372.09	140.8	3576.59
140.4	2485.89	140.7	3615.51
140.3	2462.28	140.6	3525.54
140.2	2506.61	140.5	3563.71
140.1	2512.3	140.4	3507.48
140	2377.78	140.3	3628.8
139.9	2562.67	140.2	3506.58
139.8	2408.46	140.1	3466.02
139.7	2567.84	140	3482.09
139.6	2435.67	139.9	3522.63
139.5	2482.39	139.8	3643.34
139.4	2489.87	139.7	3555.77
139.3	2506.35	139.6	3606.57
139.2	2380.49	139.5	3413.06
139.1	2528.53	139.4	3470.43
139	2545.45	139.3	3510.53
138.9	2521.1	139.2	3547.42
138.8	2485.99	139.1	3519.28
138.7	2590.55	139	3529.16
138.6	2572.38	138.9	3596.63
138.5	2568.17	138.8	3631.22
138.4	2621.7	138.7	3577.68
138.3	2582.6	138.6	3524
138.2	2454.56	138.5	3510.43
138.1	2435.87	138.4	3675.86
138	2614.19	138.3	3689.57
137.9	2468.07	138.2	3620.95
137.8	2420.67	138.1	3645.01
137.7	2488.25	138	3538.91
137.6	2531.96	137.9	3550.61
137.5	2477.98	137.8	3644.32
137.4	2492.48	137.7	3635.69
137.3	2527.48	137.6	3538.54
137.2	2513.59	137.5	3568.59
137.1	2501.62	137.4	3819.49
137	2485.13	137.3	3511.74
136.9	2437.78	137.2	3631.16
136.8	2437.73	137.1	3528.61
136.7	2574	137	3413.41
136.6	2552.06	136.9	3531.17
136.5	2460.07	136.8	3516.4
136.4	2442.9	136.7	3555.37
136.3	2337.64	136.6	3436.98
136.2	2419.12	136.5	3477.41
136.1	2539.27	136.4	3514.71
136	2508.49	136.3	3457.76
135.9	2491.04	136.2	3356.02
135.8	2582.34	136.1	3665.84
135.7	2557.92	136	3493.14
135.6	2621.87	135.9	3556.35
135.5	2460.56	135.8	3538.42
135.4	2436.89	135.7	3544.69
135.3	2468.12	135.6	3737.01
135.2	2434.73	135.5	3711.09
135.1	2443.41	135.4	3760.3
135	2542.57	135.3	3721.35
134.9	2613.84	135.2	3686.8
134.8	2459.35	135.1	3855.17
134.7	2371.46	135	3764.39
134.6	2475.75	134.9	3949.81
134.5	2557.51	134.8	3987.52
134.4	2580.54	134.7	3983.8
134.3	2447.44	134.6	4128.69
134.2	2448.09	134.5	4387.2
134.1	2431.33	134.4	4563.12
134	2556.63	134.3	4513.37
133.9	2477.08	134.2	4815.48
133.8	2502.44	134.1	4923.4
133.7	2590.81	134	5084.63
133.6	2407.08	133.9	5067.96
133.5	2505.88	133.8	5255.96
133.4	2531.37	133.7	5353.68
133.3	2639.18	133.6	5396.56
133.2	2598.17	133.5	5612.05
133.1	2426.26	133.4	5913.12
133	2431.07	133.3	5753.76
132.9	2558.78	133.2	5881.27
132.8	2441.98	133.1	5921.55
132.7	2443.22	133	5818.52
132.6	2557.59	132.9	5574.67
132.5	2629.28	132.8	5457.15
132.4	2524.75	132.7	5178.36
132.3	2533.8	132.6	5179.45
132.2	2481.99	132.5	4952.02
132.1	2421.55	132.4	4753.86
132	2501.73	132.3	4477.98
131.9	2470.27	132.2	4417.27
131.8	2459.98	132.1	4096.86
131.7	2529.04	132	3953.31
131.6	2530.64	131.9	3982.87
131.5	2443.29	131.8	3979.67
131.4	2506.84	131.7	3706.86
131.3	2452.09	131.6	3613.72
131.2	2558.94	131.5	3523.19
131.1	2496.7	131.4	3639.89
131	2533.78	131.3	3674.65
130.9	2518.63	131.2	3739.07
130.8	2613.72	131.1	3420.81
130.7	2516.66	131	3709.05
130.6	2432.75	130.9	3632.74
130.5	2583.77	130.8	3520.6
130.4	2511.87	130.7	3532.09
130.3	2440.66	130.6	3695.17
130.2	2588.15	130.5	3619.87
130.1	2546.25	130.4	3509.37
130	2511.32	130.3	3539.34
129.9	2443.03	130.2	3514.16
129.8	2520.69	130.1	3530.07
129.7	2539.87	130	3499.01
129.6	2498.11	129.9	3662.18
129.5	2647.89	129.8	3596.01
129.4	2526.5	129.7	3675.17
129.3	2651.52	129.6	3466.76
129.2	2535.28	129.5	3471.76
129.1	2462.95	129.4	3551.04
129	2497.64	129.3	3574.23
128.9	2416.04	129.2	3505.53
128.8	2446.75	129.1	3528.33
128.7	2570.3	129	3567.78
128.6	2479.41	128.9	3494.85
128.5	2513.19	128.8	3512.29
128.4	2452.59	128.7	3553.71
128.3	2531.97	128.6	3520.3
128.2	2570.19	128.5	3521.2
128.1	2486.27	128.4	3440.91
128	2503.71	128.3	3472.13
127.9	2574.37	128.2	3631.28
127.8	2455.99	128.1	3542.05
127.7	2527.68	128	3579.63
127.6	2477.64	127.9	3670.06
127.5	2614.17	127.8	3547.1
127.4	2402.7	127.7	3572.5
127.3	2511.72	127.6	3508.98
127.2	2532.58	127.5	3558.01
127.1	2440.44	127.4	3646.85
127	2515.41	127.3	3576.05
126.9	2509.41	127.2	3500.82
126.8	2566.84	127.1	3622.89
126.7	2631.58	127	3595.59
126.6	2632.05	126.9	3563.37
126.5	2560.09	126.8	3461.28
126.4	2535.19	126.7	3604.54
126.3	2504.57	126.6	3441.51
126.2	2471.73	126.5	3654
126.1	2647.75	126.4	3647.8
126	2646.59	126.3	3470.96
125.9	2472.64	126.2	3612.72
125.8	2480.54	126.1	3685.32
125.7	2552.99	126	3555.11
125.6	2426.99	125.9	3712.76
125.5	2614.52	125.8	3582.39
125.4	2564.58	125.7	3558.87
125.3	2568.59	125.6	3394.42
125.2	2451.91	125.5	3592.82
125.1	2607.77	125.4	3572.86
125	2485.3	125.3	3740.91
124.9	2468.35	125.2	3484.68
124.8	2398.24	125.1	3455.11
124.7	2598.44	125	3594.25
124.6	2484.48	124.9	3653.89
124.5	2532.86	124.8	3586.68
124.4	2687.09	124.7	3516.87
124.3	2540.01	124.6	3651.66
124.2	2459.99	124.5	3670.03
124.1	2610.8	124.4	3688.23
124	2464.47	124.3	3707.42
123.9	2577.28	124.2	3698.49
123.8	2699	124.1	3752.84
123.7	2554.84	124	3669.15
123.6	2504.16	123.9	3647.25
123.5	2622.44	123.8	3637.17
123.4	2512.79	123.7	3571.25
123.3	2509	123.6	3676.15
123.2	2542.74	123.5	3540.4
123.1	2510.91	123.4	3740.15
123	2419.33	123.3	3702.73
122.9	2565.1	123.2	3586.01
122.8	2558.79	123.1	3570
122.7	2569.81	123	3622.96
122.6	2440.11	122.9	3739.65
122.5	2470.18	122.8	3643.51
122.4	2402.03	122.7	3819.32
122.3	2537.36	122.6	3626.44
122.2	2431.05	122.5	3478.77
122.1	2640.59	122.4	3729.57
122	2539.16	122.3	3715.62
121.9	2631.52	122.2	3648.89
121.8	2511.74	122.1	3590.14
121.7	2574.85	122	3520.7
121.6	2598.41	121.9	3764.96
121.5	2455.26	121.8	3791.03
121.4	2538.51	121.7	3690.61
121.3	2461.07	121.6	3596.4
121.2	2482.67	121.5	3745.84
121.1	2541.11	121.4	3581.39
121	2612.52	121.3	3658.61
120.9	2605.17	121.2	3664.69
120.8	2480.01	121.1	3610.83
120.7	2491.05	121	3729.33
120.6	2487.28	120.9	3768.26
120.5	2446.33	120.8	3644.2
120.4	2601.52	120.7	3705.06
120.3	2672.61	120.6	3763.59
120.2	2537.41	120.5	3607.54

## Sheet: figure 3f
potential (V)	I0	I1
-1.025	-0.2212	-0.3551
-0.975	-0.2109	-0.3392
-0.925	-0.2007	-0.3221
-0.875	-0.1906	-0.3061
-0.825	-0.1802	-0.2891
-0.775	-0.1703	-0.2729
-0.725	-0.1598	-0.256
-0.675	-0.1499	-0.2396
-0.625	-0.1393	-0.2229
-0.575	-0.1297	-0.2063
-0.525	-0.1189	-0.1897
-0.475	-0.1094	-0.1729
-0.425	-0.09844	-0.1565
-0.375	-0.08905	-0.1394
-0.325	-0.078	-0.1232
-0.275	-0.06874	-0.1059
-0.225	-0.05756	-0.08976
-0.175	-0.04841	-0.0723
-0.125	-0.03713	-0.05629
-0.075	-0.02808	-0.03864
-0.025	-0.01671	-0.02274
0.025	-0.00773	-0.00488
0.075	0.00372	0.01091
0.125	0.01263	0.0289
0.175	0.02414	0.04457
0.225	0.03299	0.0627
0.275	0.04455	0.0783
0.325	0.05337	0.09661
0.375	0.06496	0.1121
0.425	0.07375	0.1306
0.475	0.0854	0.1461
0.525	0.09416	0.1646
0.575	0.1058	0.1801
0.625	0.1146	0.1986
0.675	0.1263	0.2141
0.725	0.1351	0.2328
0.775	0.1468	0.2483
0.825	0.1556	0.267
0.875	0.1673	0.2826
0.925	0.1761	0.3014
0.975	0.1879	0.317
1.025	0.1967	0.3357

## Sheet: figure 4b
ssDNA@GO					nanowire-n@GO

## Sheet: figure 4c
	FL. Intensity (a.u.)
ssDNA@GO	1	1.1	1.12
nanowire-n@GO	18	19	18.4

## Sheet: figure 4d
nanowire-1@GO		nanowire-2@GO		nanowire-3@GO		nanowire-4@GO
Z' (ohm)	—Z'' (ohm)	Z' (ohm)	—Z'' (ohm)	Z' (ohm)	—Z'' (ohm)	Z' (ohm)	—Z'' (ohm)
60.06	57.96	57.83	56.22	97.66	87.02	70.52	69.85
64.94	65.38	63.07	63.11	108.1	93.72	77.43	77.87
70.45	73.74	69.01	70.73	119	100.3	85.11	86.55
76.71	83.14	75.68	79.08	129.9	107.1	93.58	95.91
83.74	93.7	83.09	88.23	140.7	114.2	102.7	106.1
91.63	105.6	91.22	98.27	151.2	122.1	112.4	117.1
100.4	118.9	100	109.3	161.3	131.4	122.6	129.4
110.2	134	109.4	121.7	171.1	142.6	133.1	143.3
121	151.2	119.5	135.7	180.7	156.6	144	159.3
132.9	170.8	130.2	151.7	190.5	173.5	155.2	178
146.1	193.3	141.6	170.2	200.6	194.2	166.9	199.8
161	219.4	154	191.9	211.4	219.8	179.5	225.7
178.5	249.3	168	217	223.5	250.8	193.1	256.7
198.9	283.6	183.9	246.3	237.4	287.8	208.2	293.5
222.9	323.7	201.9	281	253.5	332.4	225	337.7
251.5	370	223	322	272.4	385.7	244.1	390.6
286.3	423	248.1	370	295.1	449.1	266.4	453.6
328	482	278	424.8	322.5	522.8	292.3	526.9
379.4	547.5	314.4	487.8	356.3	609.6	323.4	614
442.4	619.3	359.2	559.8	398.3	711.2	361	716.7
519.1	695.8	414.5	641.1	451	829.6	407	837.2
610.4	774.4	481.7	730.6	516.2	964.6	462.6	976.3
714.8	850.7	560.9	825.2	595.2	1114	528.6	1132
842.2	924.7	662.5	929.6	700.3	1289	615.2	1320
989.9	989.1	787.3	1036	834.4	1486	725.1	1534
1149	1040	931.1	1141	995.4	1698	856.3	1771
1325	1077	1103	1248	1199	1939	1021	2054
1503	1098	1294	1347	1439	2193	1216	2368
1676	1101	1498	1430	1715	2446	1446	2704
1845	1085	1721	1495	2045	2699	1728	3075
2007	1053	1958	1537	2430	2941	2075	3476
2159	1007	2205	1554	2869	3161	2495	3903
2298	952.1	2451	1545	3355	3347	2989	4347
2422	892.6	2689	1512	3873	3494	3563	4794
2531	832	2913	1458	4411	3594	4220	5229
2629	771.9	3122	1388	4956	3641	4957	5638
2717	707.9	3316	1297	5507	3620	5787	5989
2796	647.1	3489	1198	6042	3554	6683	6277
2864	599.8	3638	1108	6533	3478	7597	6524
2925	565.2	3767	1029	6981	3401	8513	6728
2982	542	3879	960.5	7393	3331	9425	6895
3038	525.8	3983	901.1	7778	3271	10330	7033
3093	515.3	4078	849.5	8137	3224	11210	7147
3149	510	4167	805.6	8483	3196	12080	7255
3207	510.3	4252	770.9	8816	3189	12930	7373
3273	515.3	4342	743.5	9159	3210	13820	7526
3347	525.9	4435	725.1	9511	3260	14730	7718
3417	544.1	4519	717	9845	3337	15580	7923
3485	565.6	4595	713.2	10190	3426	16420	8118
3549	592.4	4666	717.1	10540	3537	17220	8319
3614	629.4	4738	734.5	10870	3694	17970	8576
3683	676.2	4815	764.4	11200	3895	18790	8939
3758	732.1	4896	805.7	11550	4136	19560	9332
3841	795.5	4984	856.1	11910	4406	20190	9703
3933	866.1	5079	915.3	12290	4700	20820	10100
4034	944.4	5180	983.3	12670	5010	21460	10550
4144	1031	5290	1061	13050	5332	22170	11090
4266	1127	5411	1148	13440	5676	22970	11740
4400	1234	5542	1247	13870	6081	23910	12550
4550	1351	5687	1356	14410	6598	25000	13490
4716	1478	5846	1477	15070	7234	26230	14560

## Sheet: figure 4e
	current increase ratio (%)
nanowire-1	57.8786	71.5948	73.3121
nanowire-2	235.124	148.559	219.988
nanowire-3	271.523	276.568	357.903
nanowire-4	395.429	422.056	422.606

## Sheet: figure 5a
concentration (pM)	current increase ratio (%)
10000	57.8786	71.5948	73.3121
1000	55.4348	42.5067	43.6816
100	34.0227	27.6703	26.8258
10	20.2737	15.9139	20
1	11.9933	8.54592	12.7646
0	4.43579	5.63433	6.45907

## Sheet: figure 5b
concentration (pM)	current increase ratio(%)
10000	395.429	422.056	422.606
1000	329.022	300.686	315.653
100	274.104	211.016	260.508
10	170.764	165.714	189.132
1	129.213	120.635	140.231
0.1	98.404	89.175	104.346
0.01	61	78.375	73.3316
0	42.507	45.006	43.6816

[truncated: 2 more sheets: figure 5c, figure 5d]
